# Supplementary material for: Multiparameter predictor model for Low Cardiac Output Syndrome After Pericardiectomy
Source: Research Square preprint supplement (doi:10.21203/rs.3.rs-7481051/v1), 2025-10-27
Supplement: Supplementary file 1 [file 9505022d24cf4691bbd83d7a.docx]

**Supplementary Table 1. Results of ten-fold cross-validation of modeling data models**

| **Type** | **Accuracy (95%CI)** | **Sensitivity (95%CI)** | **Specificity (95%CI)** |
| --- | --- | --- | --- |
| Training Set | 85.22 (84.37-86.07) | 91.42(90.49-92.35) | 82.55 (81.46-83.63) |
| Validation Set | 85.71 (77.84-93.58) | 92.57(86.65-98.49) | 82.74 (73.25-92.22) |
